# Supplementary material
Source: PubMed Central journal article supplement (PMC5821203)
Supplement: jciinsight-3-96685-s001.pdf [file jciinsight-3-96685-s001.pdf]

Supplement to:

DNA Methylation signatures reflect aging in patients with nonalcoholic steatohepatitis

Rohit Loomba, Yevgeniy Gindin, Zhaoshi Jiang, et al.

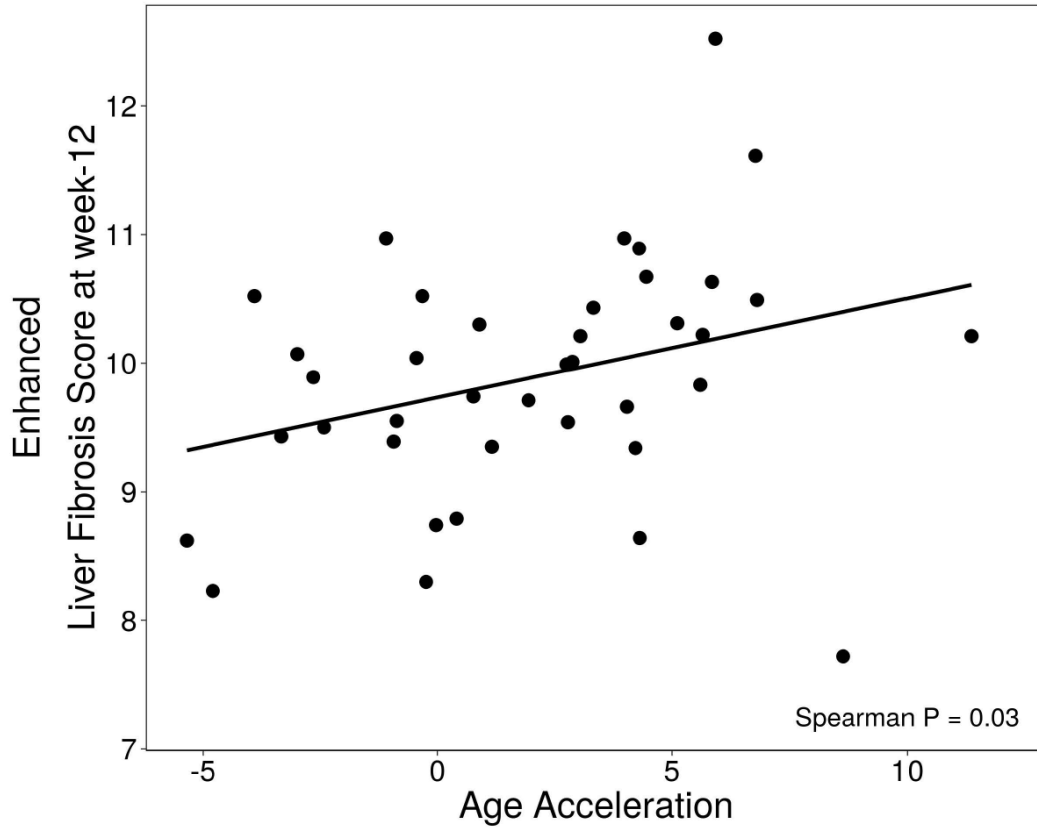

Figure S1: Age Acceleration is correlated with Enhanced Liver Fibrosis scores. Relationship between enhanced liver fibrosis score at week-12 (y-axis) and Age Acceleration (x-axis). Each dot represents a sample in the NASH cohort.
